# Supplementary material
Source: HighWire-hosted journal article supplement (https://bmjopen.bmj.com/content/12/8/e055044)
Supplement: inline-supplementary-material-1 [file inline-supplementary-material-1.pdf]

**TABLE S1.** Adjusted odds ratios predicting diabetes and adults age 35 and older by gender and survey year in Bangladesh, BDHS 2011-2018.

| Variables                 | 2011 BDHS-Male    |         | 2018 BDHS-Male    |         | 2011 BDHS-Female  |         | 2018 BDHS-Female  |         |
|---------------------------|-------------------|---------|-------------------|---------|-------------------|---------|-------------------|---------|
|                           | OR (95% CI)       | p-value | OR (95% CI)       | p-value | OR (95% CI)       | p-value | OR (95% CI)       | p-value |
| <b>Age groups</b>         |                   |         |                   |         |                   |         |                   |         |
| 35-44                     | Ref               |         | Ref               |         | Ref               |         | Ref               |         |
| 45-54                     | 1.56 (1.1, 2.21)  | 0.013   | 1.41 (0.98, 2.03) | 0.065   | 1.18 (0.87, 1.62) | 0.288   | 1.41 (1.06, 1.86) | 0.018   |
| 55-64                     | 2.36 (1.6, 3.47)  | <0.001  | 1.58 (1.09, 2.29) | 0.015   | 1.84 (1.15, 2.94) | 0.012   | 1.53 (1.09, 2.14) | 0.013   |
| 65-74                     | 1.79 (1.14, 2.8)  | 0.011   | 1.80 (1.18, 2.75) | 0.007   | 1.35 (0.76, 2.39) | 0.304   | 1.44 (0.9, 2.33)  | 0.132   |
| 75+                       | 1.52 (0.85, 2.72) | 0.153   | 1.41 (0.79, 2.51) | 0.24    | 1.92 (0.98, 3.76) | 0.059   | 1.11 (0.62, 1.99) | 0.727   |
| <b>Marital status</b>     |                   |         |                   |         |                   |         |                   |         |
| Not married               | Ref               |         |                   |         | Ref               |         |                   |         |
| Married                   | 0.66 (0.35, 1.26) | 0.205   | 1.83 (0.96, 3.47) | 0.064   | 1.00 (0.75, 1.34) | 0.992   | 1.17 (0.89, 1.56) | 0.263   |
| <b>Educational level</b>  |                   |         |                   |         |                   |         |                   |         |
| No education              | Ref               |         | Ref               |         | Ref               |         | Ref               |         |
| Primary                   | 1.22 (0.88, 1.68) | 0.236   | 1.48 (1.06, 2.06) | 0.022   | 1.37 (1, 1.86)    | 0.047   | 1.12 (0.84, 1.48) | 0.434   |
| Secondary                 | 1.14 (0.80, 1.63) | 0.47    | 1.15 (0.78, 1.69) | 0.482   | 1.53 (1.05, 2.23) | 0.029   | 1.37 (0.97, 1.92) | 0.071   |
| Higher                    | 1.99 (1.31, 3.01) | 0.001   | 1.19 (0.76, 1.86) | 0.449   | 1.85 (1.1, 3.11)  | 0.02    | 0.98 (0.59, 1.64) | 0.941   |
| <b>Place of residence</b> |                   |         |                   |         |                   |         |                   |         |
| Urban                     | 1.03 (0.76, 1.4)  | 0.838   | 0.71 (0.55, 0.93) | 0.012   | 1.1 (0.83, 1.45)  | 0.497   | 1.24 (0.96, 1.61) | 0.097   |
| Rural                     | Ref               |         | Ref               |         | Ref               |         | Ref               |         |
| <b>Geographic region</b>  |                   |         |                   |         |                   |         |                   |         |
| Barisal                   | 1.42 (0.91, 2.22) | 0.121   | 0.83 (0.53, 1.30) | 0.415   | 1.44 (0.97, 2.14) | 0.072   | 0.72 (0.46, 1.12) | 0.148   |
| Chittagong                | 1.55 (1.05, 2.27) | 0.027   | 0.88 (0.62, 1.26) | 0.484   | 1.36 (0.97, 1.91) | 0.071   | 0.88 (0.61, 1.26) | 0.48    |
| Dhaka                     | Ref               |         | Ref               |         | Ref               |         | Ref               |         |
| Khulna                    | 0.75 (0.50, 1.12) | 0.159   | 0.56 (0.39, 0.82) | 0.003   | 0.61 (0.4, 0.92)  | 0.02    | 0.65 (0.46, 0.93) | 0.019   |
| Rajshahi                  | 1.14 (0.73, 1.77) | 0.569   | 0.78 (0.52, 1.2)  | 0.259   | 1.21 (0.82, 1.77) | 0.338   | 0.71 (0.46, 1.09) | 0.116   |
| Rangpur                   | 1.04 (0.64, 1.68) | 0.885   | 0.60 (0.39, 0.92) | 0.019   | 0.99 (0.63, 1.57) | 0.975   | 0.53 (0.34, 0.82) | 0.004   |
| Sylhet                    | 1.41 (0.92, 2.15) | 0.112   | 0.66 (0.41, 1.07) | 0.091   | 1.11 (0.77, 1.6)  | 0.58    | 0.82 (0.54, 1.22) | 0.325   |
| <b>Wealth index</b>       |                   |         |                   |         |                   |         |                   |         |
| Poorest                   | Ref               |         | Ref               |         | Ref               |         | Ref               |         |
| Poorer                    | 0.81 (0.51, 1.30) | 0.389   | 1.20 (0.72, 2.00) | 0.485   | 0.96 (0.58, 1.59) | 0.88    | 0.87 (0.58, 1.32) | 0.522   |
| Middle                    | 0.75 (0.46, 1.21) | 0.239   | 1.90 (1.16, 3.12) | 0.011   | 0.99 (0.63, 1.57) | 0.981   | 1.02 (0.66, 1.57) | 0.945   |

**TABLE S1.** Adjusted odds ratios predicting diabetes and adults age 35 and older by gender and survey year in Bangladesh, BDHS 2011-2018.

| Variables         | 2011 BDHS-Male    |         | 2018 BDHS-Male    |         | 2011 BDHS-Female  |         | 2018 BDHS-Female  |         |
|-------------------|-------------------|---------|-------------------|---------|-------------------|---------|-------------------|---------|
|                   | OR (95% CI)       | p-value | OR (95% CI)       | p-value | OR (95% CI)       | p-value | OR (95% CI)       | p-value |
| Richer            | 0.95 (0.59, 1.51) | 0.815   | 2.58 (1.53, 4.34) | <0.001  | 1.43 (0.9, 2.25)  | 0.129   | 1.44 (0.94, 2.21) | 0.093   |
| Richest           | 1.54 (0.94, 2.53) | 0.088   | 5.47 (3.25, 9.19) | <0.001  | 2.38 (1.49, 3.79) | <0.001  | 2.03 (1.33, 3.09) | 0.001   |
| Body Mass Index   |                   |         |                   |         |                   |         |                   |         |
| Underweight       | 0.86 (0.6, 1.22)  | 0.382   | 0.76 (0.51, 1.13) | 0.177   | 0.69 (0.44, 1.08) | 0.101   | 0.78 (0.52, 1.18) | 0.238   |
| Normal weight     | Ref               |         | Ref               |         | Ref               |         | Ref               |         |
| Overweight        | 1.54 (1.13, 2.12) | 0.007   | 1.25 (0.94, 1.66) | 0.122   | 1.63 (1.09, 2.42) | 0.016   | 1.15 (0.86, 1.52) | 0.343   |
| Obese             | 1.71 (1.1, 2.68)  | 0.018   | 1.82 (1.22, 2.69) | 0.003   | 1.31 (0.86, 1.98) | 0.207   | 1.29 (0.95, 1.76) | 0.105   |
| Currently working |                   |         |                   |         |                   |         |                   |         |
| No                | Ref               |         | Ref               |         | Ref               |         | Ref               |         |
| Yes               | 0.71 (0.48, 1.06) | 0.09    | 0.80 (0.54, 1.17) | 0.249   | 0.84 (0.55, 1.26) | 0.394   | 0.79 (0.61, 1.03) | 0.076   |
| Hypertension      |                   |         |                   |         |                   |         |                   |         |
| No                | Ref               |         | Ref               |         | Ref               |         | Ref               |         |
| Yes               | 1.17 (0.88, 1.56) | 0.269   | 1.42 (1.1, 1.83)  | 0.007   | 1.77 (1.4, 2.24)  | <0.001  | 1.70 (1.33, 2.18) | <0.001  |

**TABLE S2.** Adjusted odds ratios predicting diabetes and adults age 35 and older by rural-urban and survey year in Bangladesh, BDHS 2011-2018.

| Variables                | 2011 BDHS-Urban   |         | 2018 BDHS-Urban   |         | 2011 BDHS-Rural   |         | 2018 BDHS-Rural   |         |
|--------------------------|-------------------|---------|-------------------|---------|-------------------|---------|-------------------|---------|
|                          | OR (95% CI)       | p-value | OR (95% CI)       | p-value | OR (95% CI)       | p-value | OR (95% CI)       | p-value |
| <b>Age groups</b>        |                   |         |                   |         |                   |         |                   |         |
| 35-44                    | Ref               |         | Ref               |         | Ref               |         | Ref               |         |
| 45-54                    | 1.58 (1.07, 2.36) | 0.023   | 1.19 (0.85, 1.65) | 0.312   | 1.22 (1.66, 0.9)  | 0.194   | 1.59 (1.18, 2.13) | 0.002   |
| 55-64                    | 3.57 (2.16, 5.9)  | <0.001  | 1.50 (0.98, 2.29) | 0.059   | 1.60 (2.3, 1.11)  | 0.011   | 1.67 (1.24, 2.27) | 0.001   |
| 65-74                    | 2.25 (1.24, 4.1)  | 0.008   | 1.50 (0.84, 2.66) | 0.168   | 1.32 (2.04, 0.86) | 0.200   | 1.75 (1.19, 2.57) | 0.004   |
| 75+                      | 2.54 (1.17, 5.5)  | 0.018   | 1.89 (1.01, 3.51) | 0.045   | 1.45 (2.45, 0.85) | 0.171   | 1.14 (0.65, 2.01) | 0.645   |
| <b>Sex</b>               |                   |         |                   |         |                   |         |                   |         |
| Female                   | 0.82 (0.49, 1.38) | 0.461   | 1.29 (0.9, 1.85)  | 0.173   | 0.76 (1.11, 0.52) | 0.15    | 0.8 (0.63, 1.03)  | 0.087   |
| Male                     | Ref               |         | Ref               |         | Ref               |         | Ref               |         |
| <b>Marital status</b>    |                   |         |                   |         |                   |         |                   |         |
| Not married              | Ref               |         |                   |         | Ref               |         |                   |         |
| Married                  | 0.8 (0.52, 1.24)  | 0.322   | 1.07 (0.7, 1.62)  | 0.759   | 1.01 (1.38, 0.74) | 0.962   | 1.39 (1.01, 1.92) | 0.043   |
| <b>Educational level</b> |                   |         |                   |         |                   |         |                   |         |
| No education             | Ref               |         | Ref               |         | Ref               |         | Ref               |         |
| Primary                  | 1.44 (0.96, 2.14) | 0.076   | 1 (0.69, 1.45)    | 0.992   | 1.26 (1.64, 0.97) | 0.086   | 1.30 (1.00, 1.69) | 0.048   |
| Secondary                | 1.46 (0.94, 2.27) | 0.089   | 1.35 (0.89, 2.03) | 0.155   | 1.22 (1.72, 0.86) | 0.272   | 1.15 (0.83, 1.59) | 0.394   |
| Higher                   | 1.9 (1.13, 3.19)  | 0.015   | 1.19 (0.74, 1.93) | 0.465   | 1.85 (2.94, 1.16) | 0.009   | 1.15 (0.74, 1.81) | 0.532   |
| <b>Geographic region</b> |                   |         |                   |         |                   |         |                   |         |
| Barisal                  | 0.93 (0.58, 1.49) | 0.76    | 0.99 (0.54, 1.83) | 0.982   | 1.63 (2.45, 1.09) | 0.018   | 0.70 (0.46, 1.06) | 0.088   |
| Chittagong               | 1.04 (0.69, 1.58) | 0.845   | 0.58 (0.4, 0.84)  | 0.004   | 1.66 (2.41, 1.15) | 0.007   | 1.04 (0.72, 1.5)  | 0.841   |
| Dhaka                    | Ref               |         | Ref               |         | Ref               |         | Ref               |         |
| Khulna                   | 0.82 (0.52, 1.28) | 0.381   | 0.70 (0.5, 1.00)  | 0.05    | 0.61 (0.91, 0.4)  | 0.017   | 0.57 (0.4, 0.81)  | 0.002   |
| Rajshahi                 | 0.94 (0.60, 1.48) | 0.802   | 0.74 (0.51, 1.06) | 0.095   | 1.28 (1.9, 0.86)  | 0.228   | 0.75 (0.51, 1.12) | 0.165   |
| Rangpur                  | 0.77 (0.46, 1.29) | 0.318   | 0.5 (0.33, 0.78)  | 0.002   | 1.07 (1.71, 0.67) | 0.775   | 0.58 (0.4, 0.84)  | 0.005   |
| Sylhet                   | 1.43 (0.89, 2.31) | 0.143   | 0.71 (0.47, 1.09) | 0.115   | 1.22 (1.79, 0.83) | 0.318   | 0.77 (0.5, 1.18)  | 0.226   |
| <b>Wealth index</b>      |                   |         |                   |         |                   |         |                   |         |
| Poorest                  | Ref               |         | Ref               |         | Ref               |         | Ref               |         |

**TABLE S2.** Adjusted odds ratios predicting diabetes and adults age 35 and older by rural-urban and survey year in Bangladesh, BDHS 2011-2018.

| Variables         | 2011 BDHS-Urban   |         | 2018 BDHS-Urban   |         | 2011 BDHS-Rural   |         | 2018 BDHS-Rural   |         |
|-------------------|-------------------|---------|-------------------|---------|-------------------|---------|-------------------|---------|
|                   | OR (95% CI)       | p-value | OR (95% CI)       | p-value | OR (95% CI)       | p-value | OR (95% CI)       | p-value |
| Poorer            | 1.23 (0.49, 3.07) | 0.653   | 0.87 (0.36, 2.08) | 0.754   | 0.87 (1.27, 0.6)  | 0.468   | 0.98 (0.67, 1.42) | 0.896   |
| Middle            | 1.05 (0.49, 2.24) | 0.900   | 0.67 (0.3, 1.51)  | 0.335   | 0.84 (1.2, 0.58)  | 0.327   | 1.42 (0.97, 2.08) | 0.07    |
| Richer            | 0.92 (0.49, 1.72) | 0.787   | 1.74 (0.81, 3.76) | 0.155   | 1.27 (1.85, 0.87) | 0.218   | 1.64 (1.08, 2.47) | 0.019   |
| Richest           | 1.67 (0.89, 3.11) | 0.108   | 2.54 (1.21, 5.34) | 0.014   | 2.05 (3.05, 1.38) | <0.001  | 3.05 (2.03, 4.60) | <0.001  |
| Body Mass Index   |                   |         |                   |         |                   |         |                   |         |
| Underweight       | 0.96 (0.55, 1.68) | 0.884   | 1.24 (0.73, 2.1)  | 0.422   | 0.77 (1.07, 0.55) | 0.119   | 0.68 (0.49, 0.94) | 0.02    |
| Normal weight     | Ref               |         | Ref               |         | Ref               |         | Ref               |         |
| Overweight        | 2.27 (1.47, 3.5)  | <0.001  | 0.99 (0.7, 1.41)  | 0.971   | 1.32 (1.8, 0.97)  | 0.077   | 1.36 (1.06, 1.73) | 0.015   |
| Obese             | 2.86 (1.88, 4.34) | <0.001  | 1.5 (1.04, 2.16)  | 0.029   | 1.1 (1.55, 0.78)  | 0.581   | 1.36 (0.98, 1.89) | 0.068   |
| Currently working |                   |         |                   |         |                   |         |                   |         |
| No                | Ref               |         | Ref               |         | Ref               |         | Ref               |         |
| Yes               | 0.91 (0.6, 1.38)  | 0.664   | 1.04 (0.73, 1.48) | 0.828   | 0.69 (0.49, 0.99) | 0.044   | 0.73 (0.57, 0.95) | 0.02    |
| Hypertension      |                   |         |                   |         |                   |         |                   |         |
| No                | Ref               |         | Ref               |         | Ref               |         | Ref               |         |
| Yes               | 1.52 (1.15, 2.02) | 0.004   | 1.58 (1.18, 2.11) | 0.002   | 1.50 (1.91, 1.18) | 0.001   | 1.6 (1.29, 1.99)  | <0.001  |
